# Supplementary material for: Systematic review of the incidence of post-operative trichiasis in Africa
Source: Springer Nature journal article supplement (doi:10.1186/s12886-020-01564-0), 2020-11-17
Supplement: MOESM1 [file 18595038]

Search Strategy: PubMed

((("trichiasis"[MeSH Terms] OR "trichiasis"[All Fields]) OR "trichiasis"[MeSH Terms])  
OR ("entropion"[MeSH Terms] OR "entropion"[All Fields])) OR "entropion"[MeSH  
Terms]
